# Supplementary material for: The Presence of Clitoromegaly in the Nonclassical Form of 21-Hydroxylase Deficiency Could Be Partially Modulated by the CAG Polymorphic Tract of the Androgen Receptor Gene
Source: PubMed Central journal article supplement (PMC4744051; doi:10.1371/journal.pone.0148548), 2016-02-05
Supplement: pone.0148548.s002.pdf [file pone.0148548.s002.pdf]

|                 | A/C genotype group   |                  |                       | C/C genotype group   |                  |                       |
|-----------------|----------------------|------------------|-----------------------|----------------------|------------------|-----------------------|
|                 | Age group            | CYP21A2 genotype | Allelic frequency (%) | Age group            | CYP21A2 genotype | Allelic frequency (%) |
| Longer alleles  | Pediatric            | A/C              | 13                    | Pediatric            | C/C              | 16                    |
|                 | Adolescent/<br>adult | A/C              | 18<br>p=0.5           | Adolescent/<br>adult | C/C              | 9<br>p=0.28           |
| Shorter alleles | Pediatric            | A/C              | 10                    | Pediatric            | C/C              | 2                     |
|                 | Adolescent/<br>adult | A/C              | 15<br>p=0.37          | Adolescent/<br>adult | C/C              | 17<br>p=0.01          |
