# Supplementary material for: The Presence of Clitoromegaly in the Nonclassical Form of 21-Hydroxylase Deficiency Could Be Partially Modulated by the CAG Polymorphic Tract of the Androgen Receptor Gene
Source: PubMed Central journal article supplement (PMC4744051; doi:10.1371/journal.pone.0148548), 2016-02-05
Supplement: pone.0148548.s003.pdf [file pone.0148548.s003.pdf]

| CYP21A2 genotype | Patients n (%) | Mean nCAG  | Shorter Alleles n (%) | Period of manifestations |           |
|------------------|----------------|------------|-----------------------|--------------------------|-----------|
|                  |                |            |                       | childhood (n)            | adult (n) |
| V281L/V281L      | 42 (36.8)      | 21.3 ± 2.8 | 9 (10.7)              | 16                       | 26        |
| I2Sp/V281L       | 15 (13.2)      | 21.3 ± 3.2 | 4 (13.3)              | 8                        | 7         |
| LR/V281L         | 12 (10.5)      | 22.6 ± 1.2 | 0                     | 4                        | 8         |
| P453S/V281L      | 7 (6.1)        | 21 ± 3.6   | 3 (21.4)              | 4                        | 3         |
| R356W/V281L      | 4 (3.5)        | 22.7 ± 1.3 | 0                     | 3                        | 1         |
| Del 8nt/V281L    | 3 (2.6)        | 19.6 ± 2.1 | 2 (33.3)              | 2                        | 1         |
